# Supplementary material for: Size and shape controlled LiMnPO4 nanocrystals by a supercritical ethanol process and their electrochemical properties
Source: Royal Society of Chemistry journal article supplement (doi:10.1039/c1jm12208h), 2011-01-01
Supplement: c1jm12208h.pdf [file c1jm12208h.pdf]

## Supporting Information

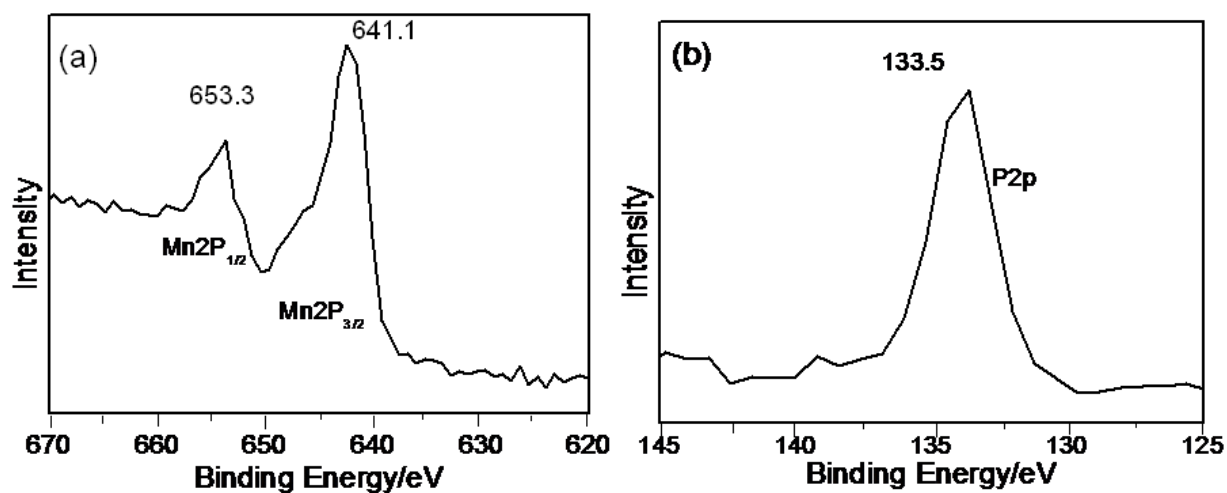

Figure S1. XPS spectra of LiMnPO<sub>4</sub> nanocrystals showing the Mn 2p<sub>1/2</sub> and 2p<sub>3/2</sub> as 653.3 and 641.1 eV, respectively.

| Sl.No | Temperature (°C) | Precursor concentration (M) | Crystallite size (nm) |
|-------|------------------|-----------------------------|-----------------------|
| 1     | 250, 275         | 0.015                       | 7                     |
| 2     | 325              | 0.015                       | 8                     |
| 3     | 375              | 0.015                       | 12                    |
| 4     | 400              | 0.005-0.025                 | 13-15                 |

Table S1. The average crystallite size of the LiMnPO<sub>4</sub> NCs calculated by the XRD data using Scheerer's equation.

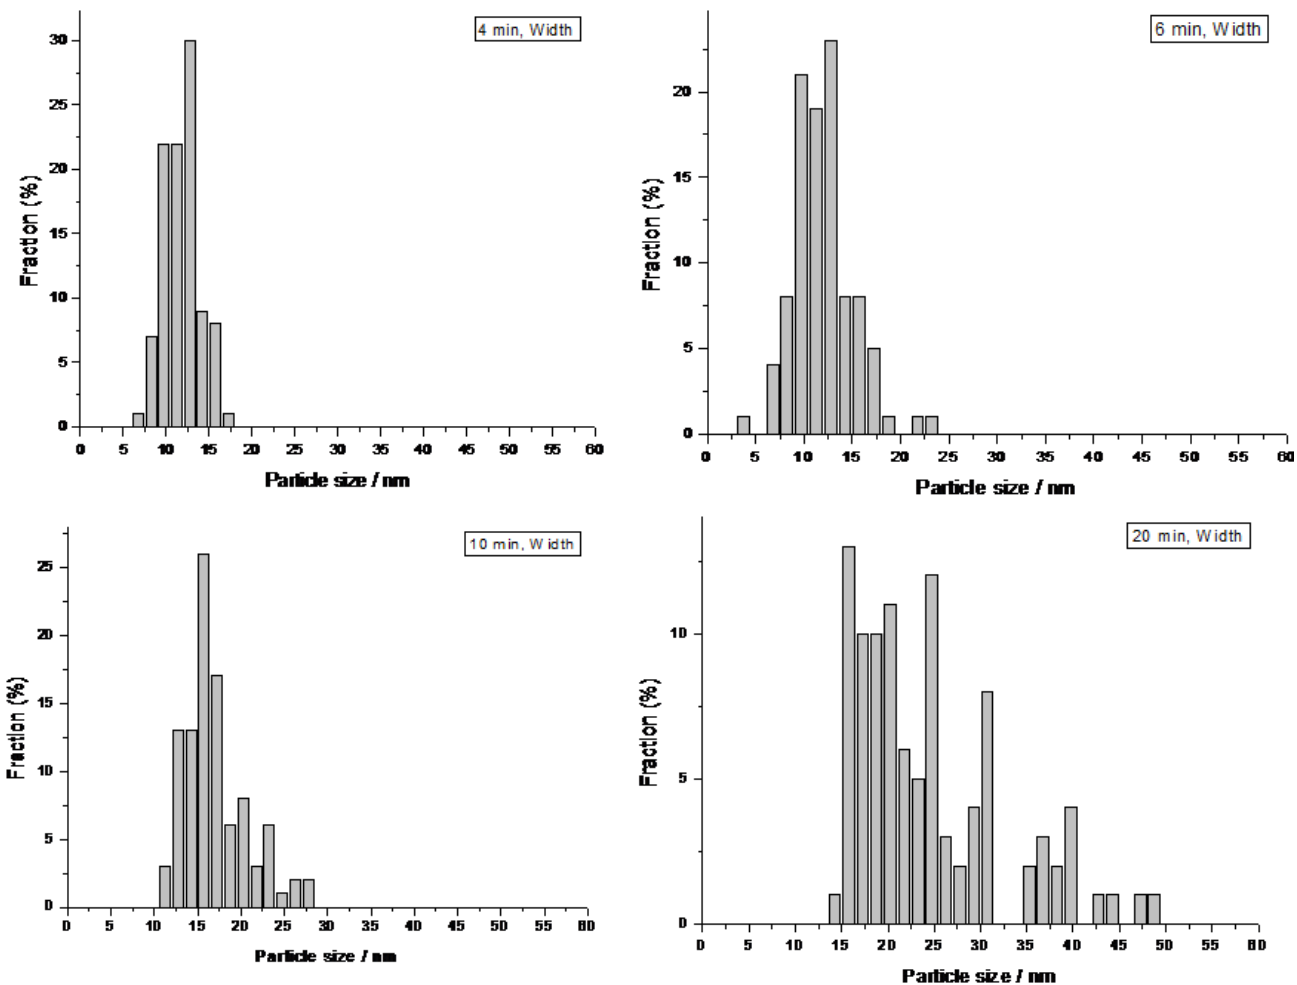

Figure S2. Histograms of  $\text{LiMnPO}_4$  NCs synthesized at different reaction time.

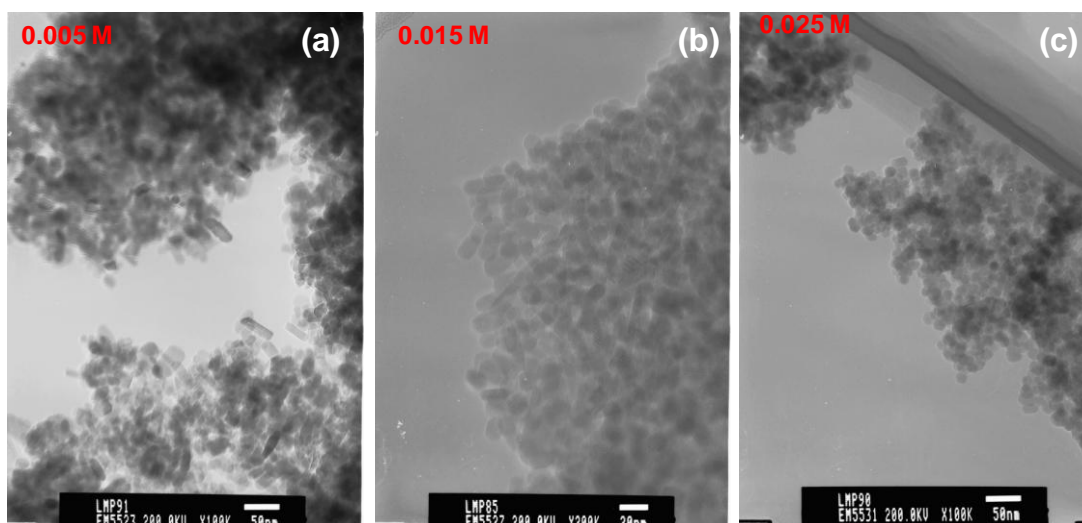

Figure S3. TEM images of  $\text{LiMnPO}_4$  NCs synthesized using different precursor concentration.

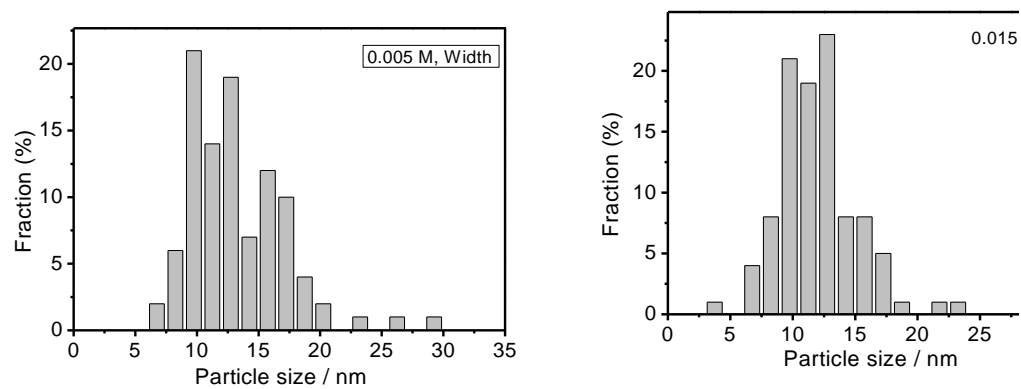

Figure S4. Histograms of LiMnPO<sub>4</sub> NCs synthesized using different precursor concentration

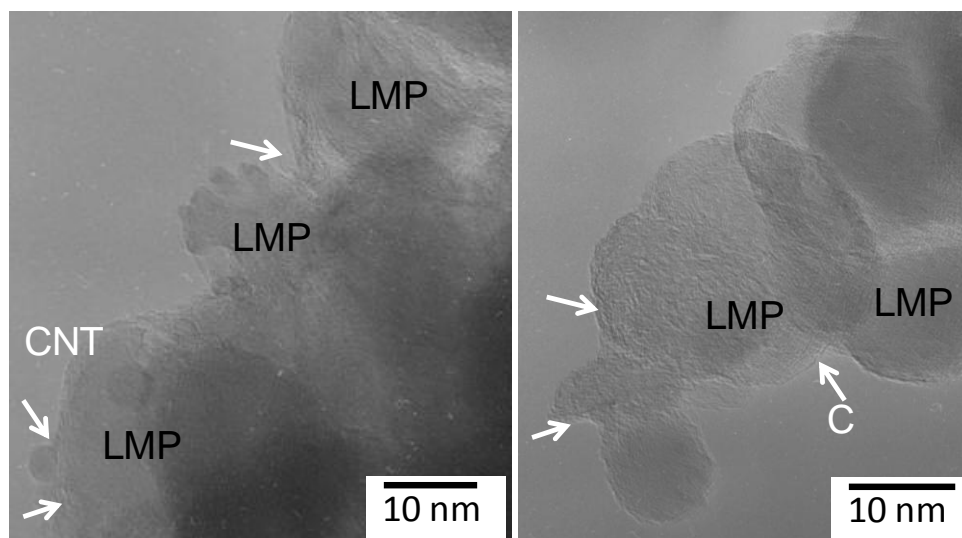

Figure S5. TEM images of carbon coated LiMnPO<sub>4</sub> after ball milling carbon coating.

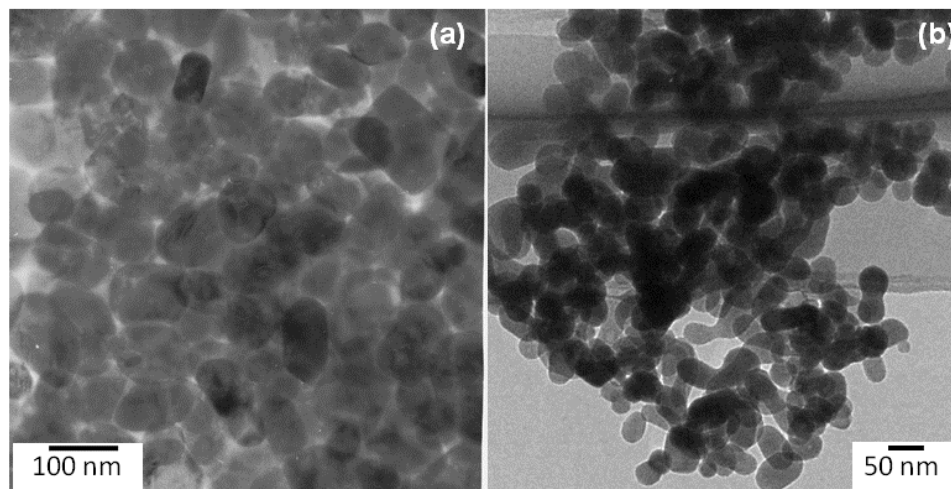

Figure S6. TEM images of LiMnPO<sub>4</sub> with average particle size 80 nm (a) and 60 nm (b).
